# Supplementary material for: The Biological Impact of Some Phosphonic and Phosphinic Acid Derivatives on Human Osteosarcoma
Source: MDPI journal article supplement (doi:10.3390/cimb46050290), 2024-05-15
Supplement: s1 [file s1]

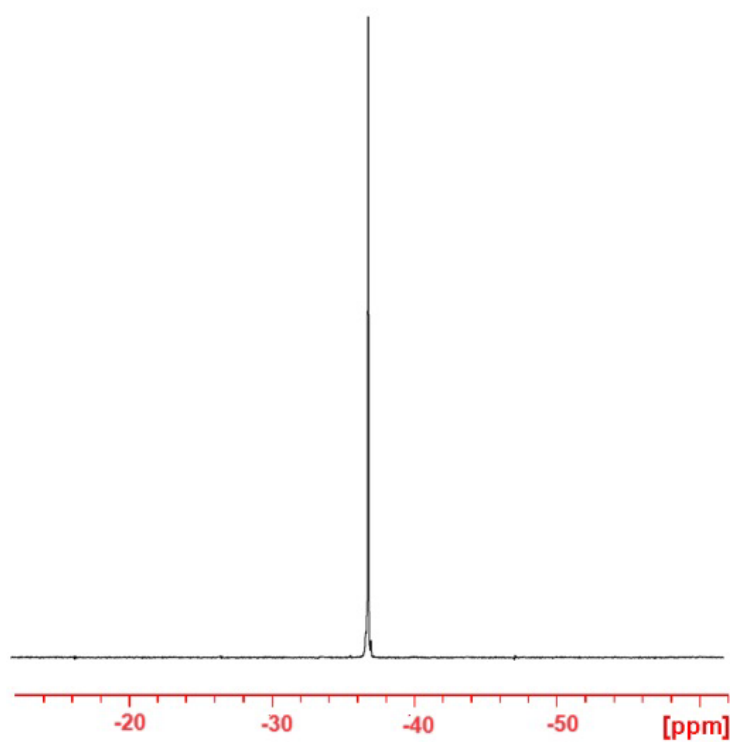

**Figure S1.**  $^{31}\text{P}$  NMR analysis by employing a Bruker DRX 400 MHz spectrometer.

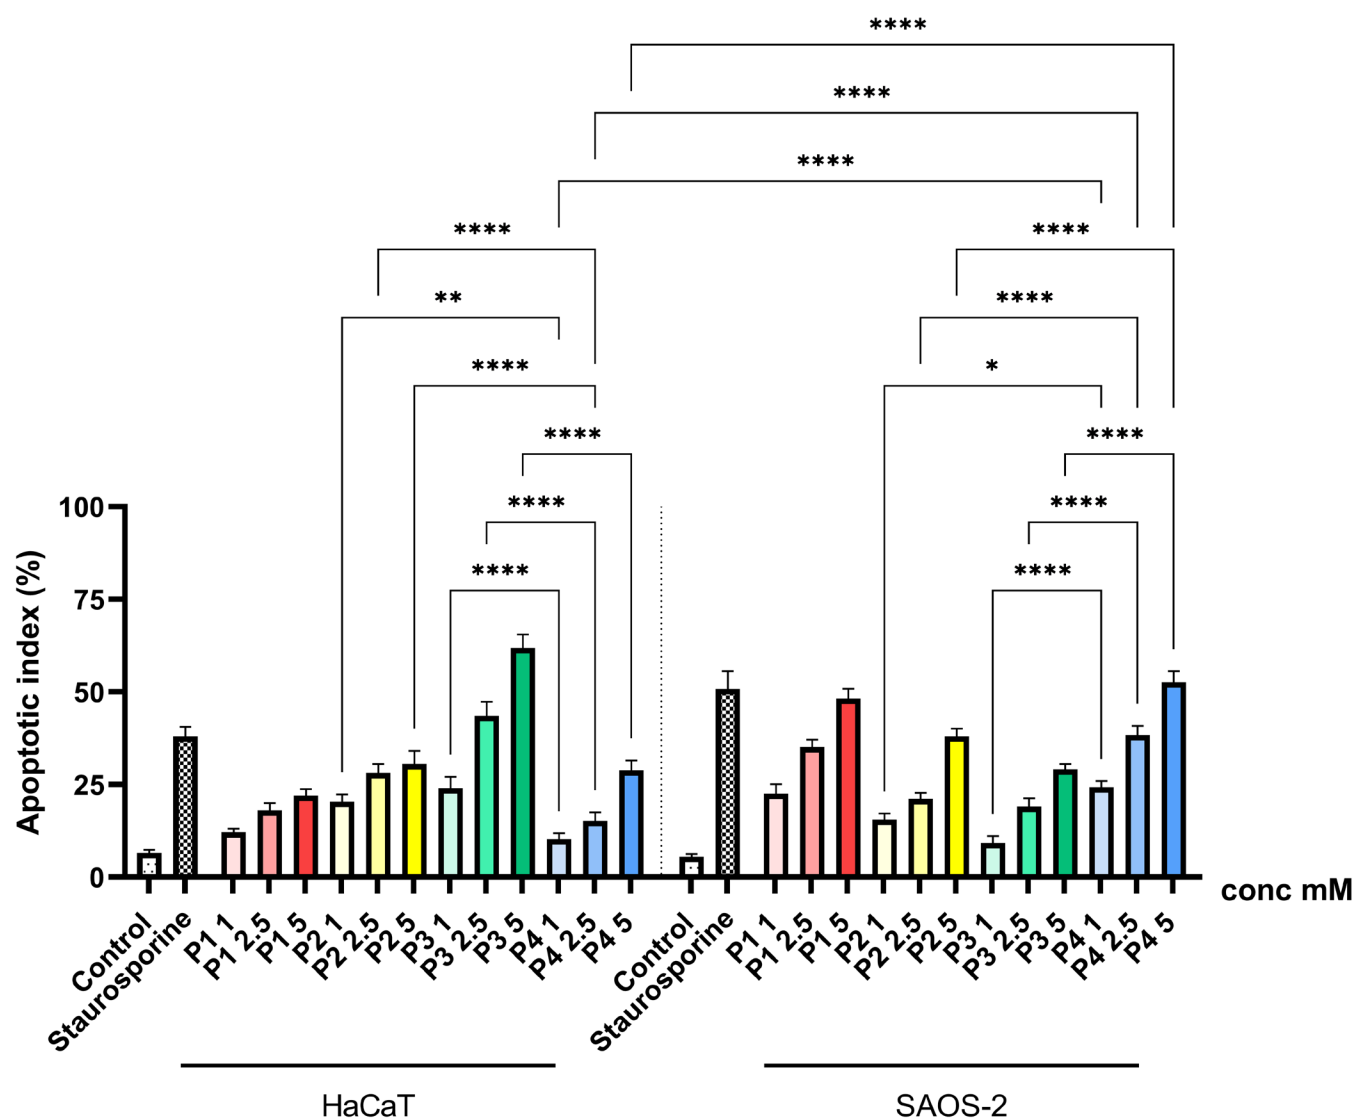

**Figure S2.** Apoptotic index (%) of immortalized human keratinocytes (HaCaT) and human osteosarcoma cells (SAOS-2) after treatment with test samples (P1, P2, P3, P4) at concentrations of 1, 2.5 and 5 mM for an interval of 24h. One-way analysis of variance (ANOVA) was applied to determine the statistical differences followed by Tukey's multiple comparisons test (\*  $p < 0.05$ ; \*\*  $p < 0.01$ ; \*\*\*  $p < 0.0001$ ).
